# Supplementary material for: Fabrication of 2D graphene oxide incorporating S-scheme Sn2S3–In2S3 heterojunctions for enhanced photocatalytic mineralization of organic pollutants
Source: Royal Society of Chemistry journal article supplement (doi:10.1039/d4nj00392f), 2024-01-01
Supplement: d4nj00392f1.pdf [file d4nj00392f1.pdf]

## **Supplementary Information File**

### **Fabrication of 2D graphene oxide incorporated S-scheme Sn<sub>2</sub>S<sub>3</sub>-In<sub>2</sub>S<sub>3</sub> heterojunction for enhanced photocatalytic mineralization of organic pollutants**

**Zia ul Haq, Aaliya Qureashi, Irfan Nazir, Firdous Ahmad Ganaie, Arshid Bashir, Lateef Ahmad Malik, Altaf Hussain Pandith\***

*Key Laboratory of Nanoscience and Quantum Computations, Department of Chemistry,*

*University of Kashmir, India*

*\*Corresponding Author:*

**(Prof. Altaf Hussain Pandith)**

Department of Chemistry

University of Kashmir

**Srinagar-190006**

**India**

Phone: +91-194-2424900(OFFICE)

+91-7006429021 (Mobile)

Fax: +91-194-2414049

E-mail: [altafpandit23@gmail.com](mailto:altafpandit23@gmail.com)

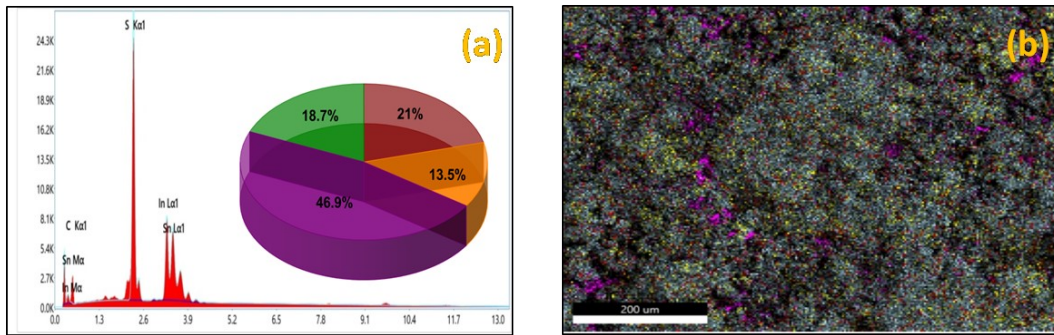

Fig. S1a EDS spectra of  $\text{Sn}_2\text{S}_3\text{-In}_2\text{S}_3/\text{GO}$  (a), elemental mapping of  $\text{Sn}_2\text{S}_3\text{-In}_2\text{S}_3/\text{GO}$  (b).

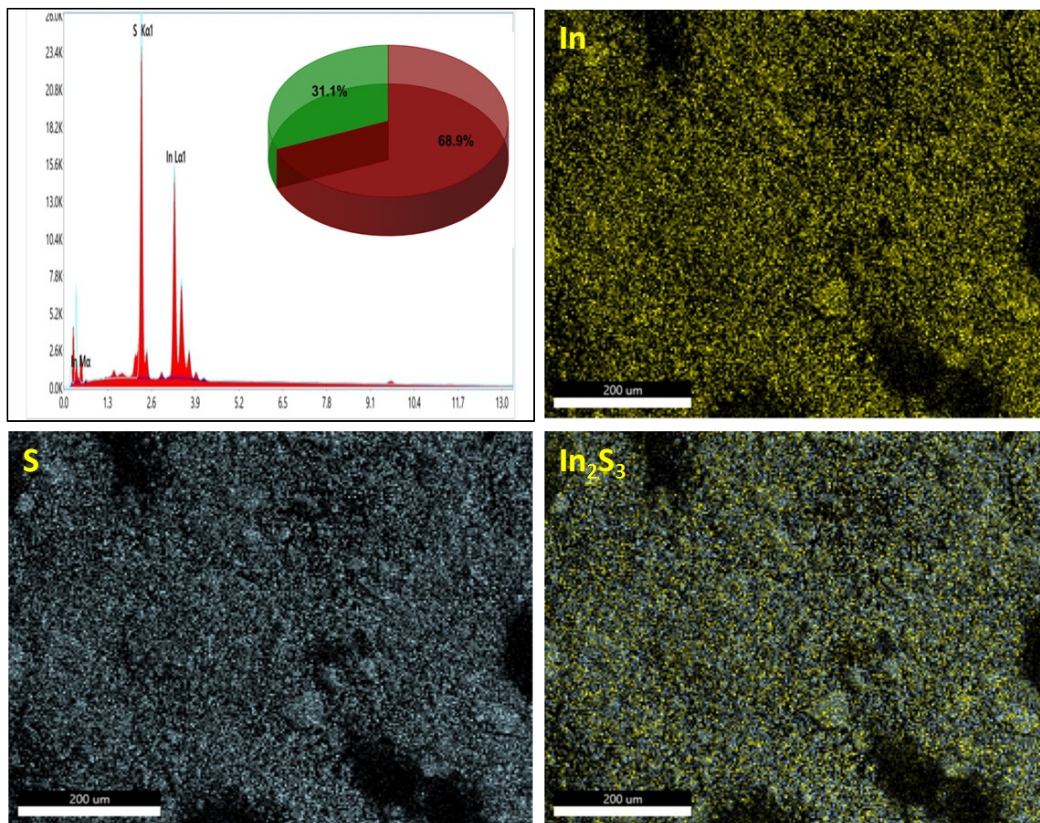

Fig. S1b EDS spectra of  $\text{In}_2\text{S}_3$ , and elemental mapping images of  $\text{In}_2\text{S}_3$ .

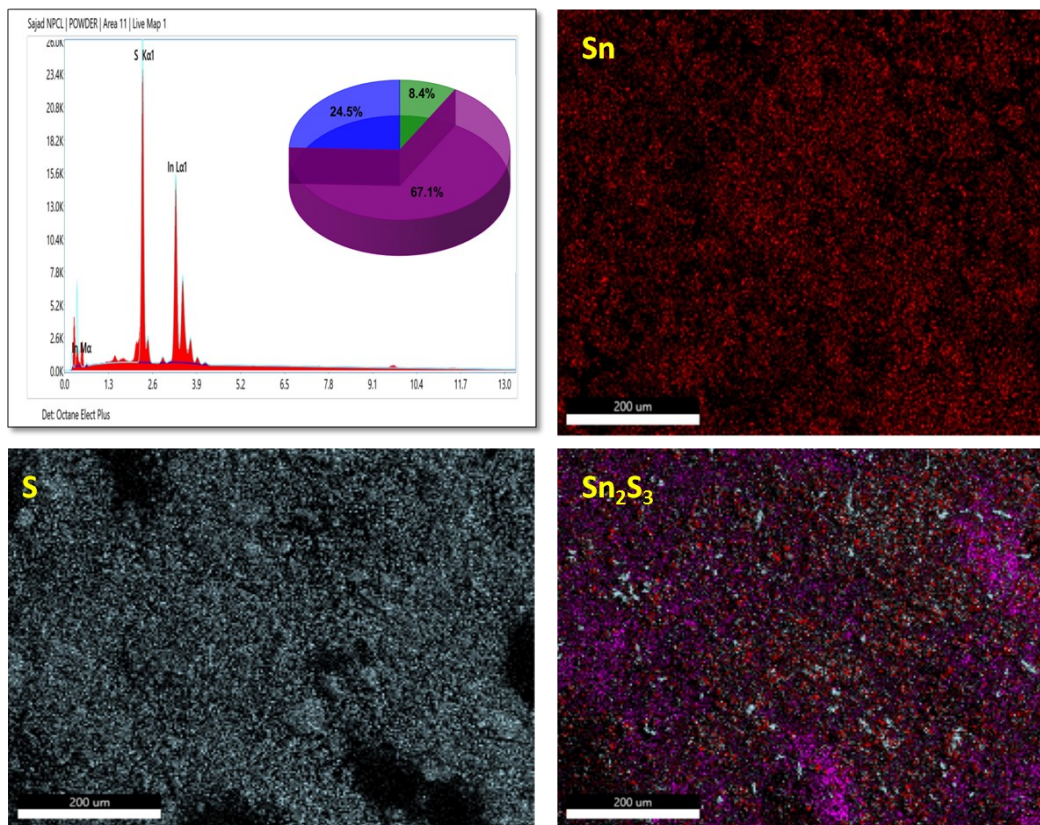

Fig. S1c (a) EDS spectra of  $\text{Sn}_2\text{S}_3$ , and elemental mapping images of  $\text{Sn}_2\text{S}_3$ .

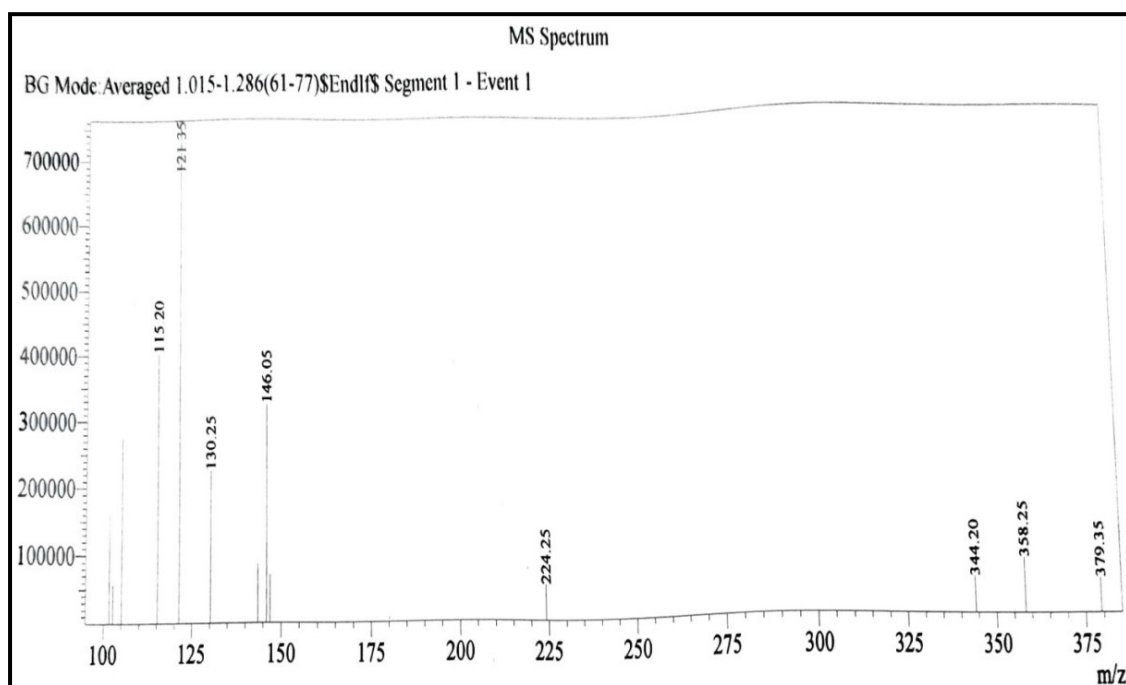

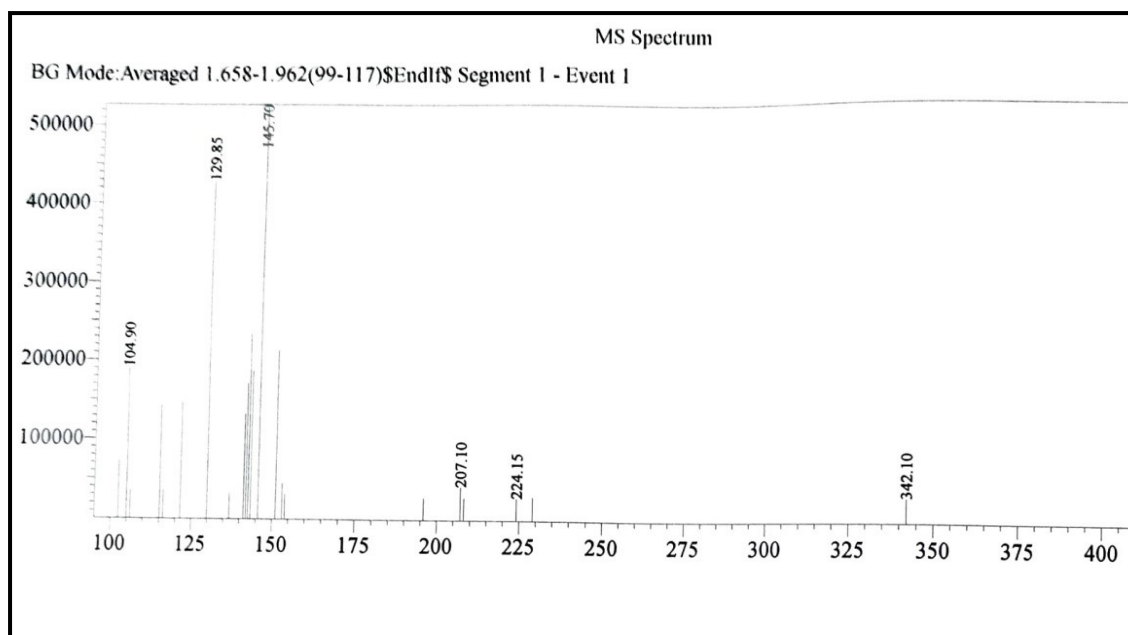

Fig. S2 GC-MS analysis of products of Crystal Violet Dye degradation by  $\text{Sn}_2\text{S}_3\text{-In}_2\text{S}_3/\text{GO}$ .
